# Supplementary material
Source: PubMed Central journal article supplement (PMC5993983)
Supplement: mmc1.pdf [file mmc1.pdf]

YMTHE, Volume 26

## **Supplemental Information**

### **A Positive Feed-Forward Loop between LncRNA-CYTOR and Wnt/ $\beta$ -Catenin Signaling Promotes Metastasis of Colon Cancer**

**Ben Yue, Chenchen Liu, Huimin Sun, Mengru Liu, Chenlong Song, Ran Cui, Shenglong Qiu, and Ming Zhong**

Supplementary Figure S1

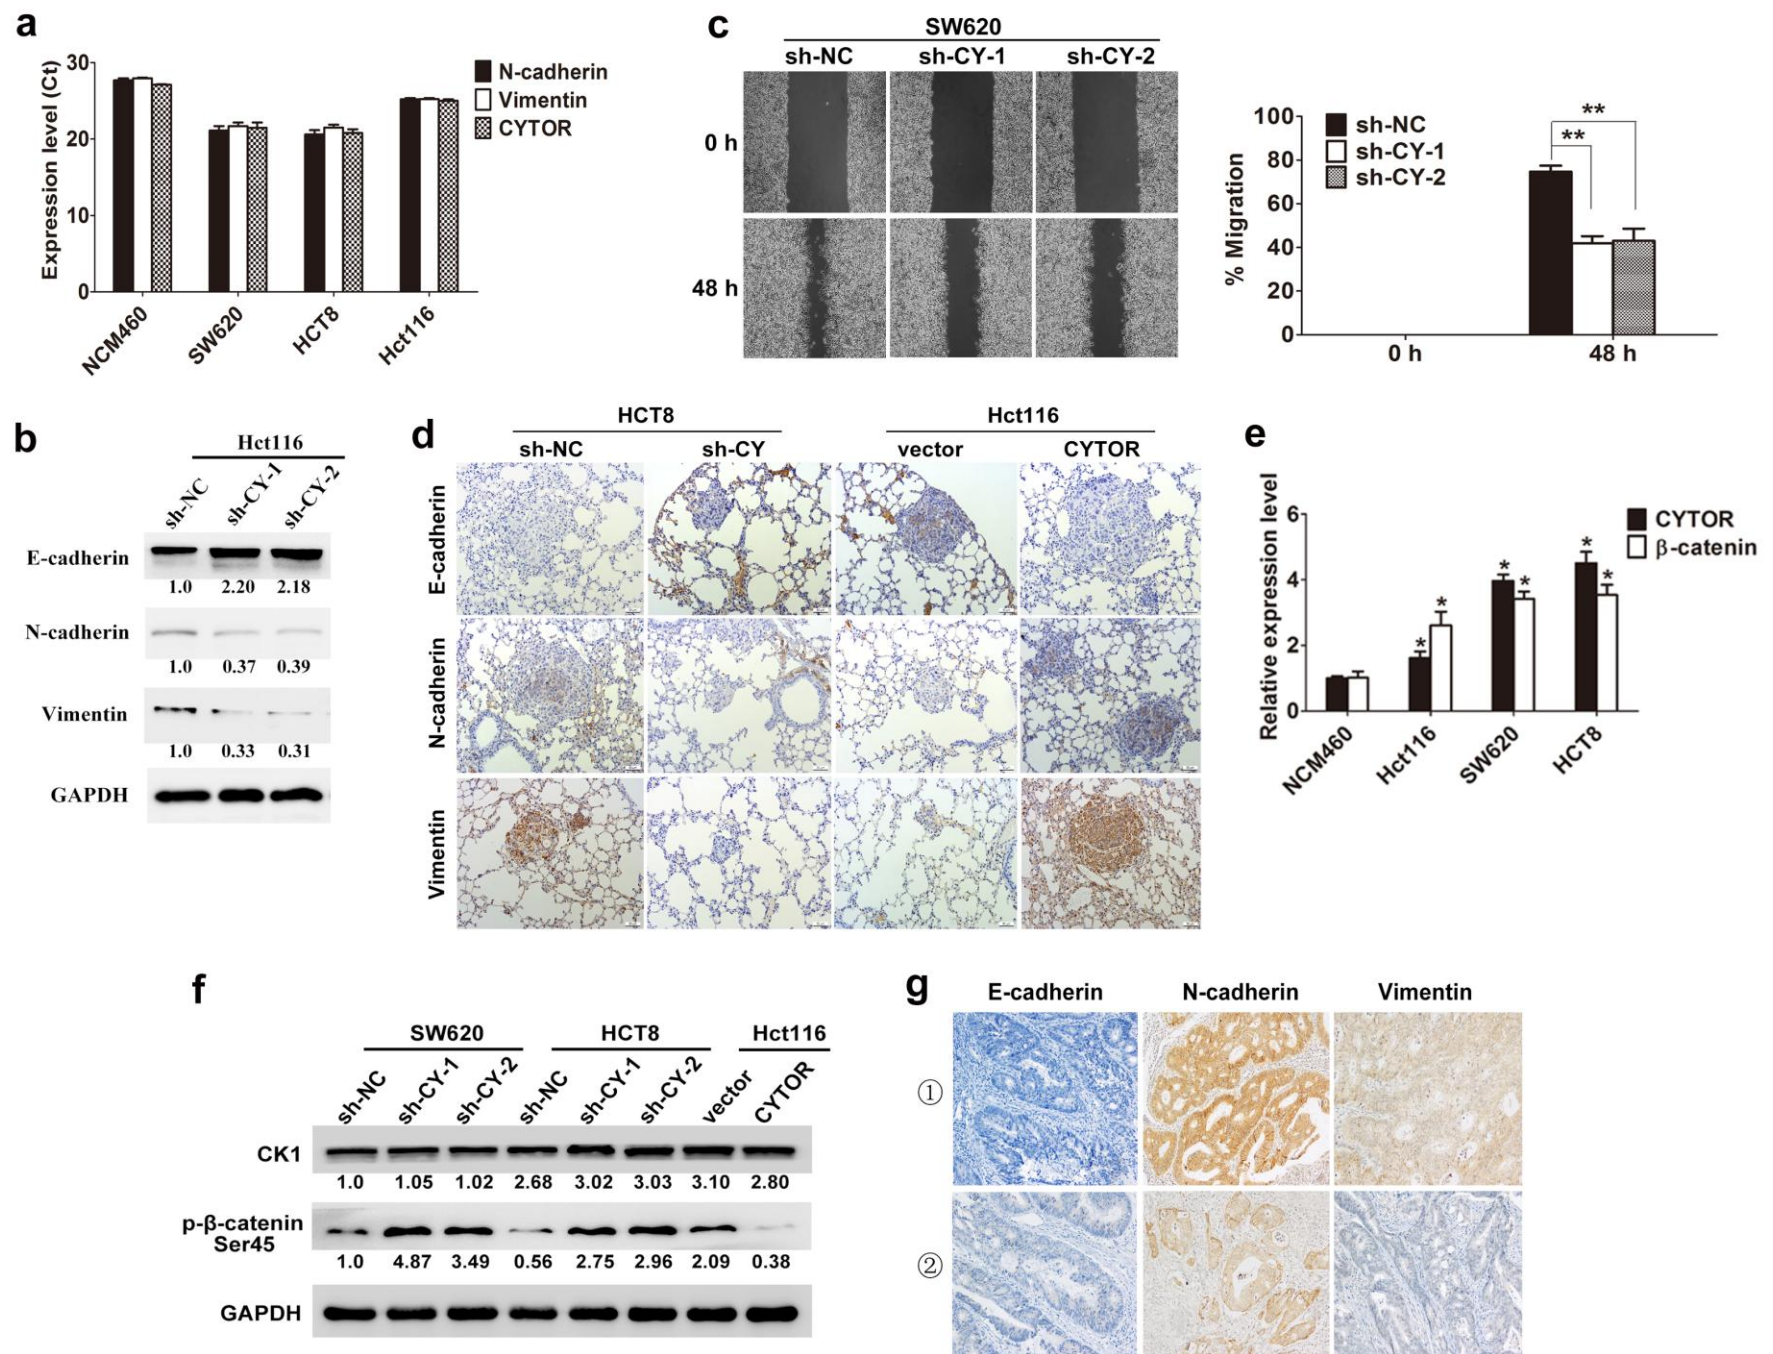

**Supplementary Fig S1.** (a) The endogenous levels of CYTOR and mesenchymal markers N-cadherin and Vimentin were comparable in human colon mucosal epithelial cell line NCM460 and colon cancer cell lines. (b) Knockdown of CYTOR resulted in a significant upregulation of E-cadherin, accompanied by a prominent downregulation of N-cadherin and Vimentin in Hct116 cells. (c) Knockdown of CYTOR significantly decreased cells' migratory ability in SW620 cell line. (d) N-cadherin and Vimentin were reduced, and E-cadherin was upregulated in the lung metastatic tumor tissues with CYTOR knockdown. N-cadherin and Vimentin were upregulated, and E-cadherin was reduced in the lung metastatic tumor tissues with CYTOR overexpression. (e)  $\beta$ -catenin levels are relatively higher with concurrent elevated CYTOR in colon cancer cell lines. (f) Increased phosphorylation levels of  $\beta$ -catenin at Ser45 was observed in cells transfected with CYTOR shRNA, whereas overexpression of CYTOR significantly decreased phospho- $\beta$ -catenin<sup>Ser45</sup> expression. CK1 levels showed no obvious changes in the subgroups of every cell line. (g) ① CYTOR<sup>high</sup>/ $\beta$ -catenin<sup>nuc</sup> group, ②CYTOR<sup>low</sup>/ $\beta$ -catenin<sup>cyto</sup> group. Representative staining of E-cadherin, N-cadherin and Vimentin in CYTOR<sup>high</sup>/ $\beta$ -catenin<sup>nuc</sup> and CYTOR<sup>low</sup>/ $\beta$ -catenin<sup>cyto</sup> tumor tissues. \* $P$ <0.05, \*\* $P$ <0.01.

**Supplementary Table S1.** Association between clinicopathologic features and CYTOR expression

| Variable        | n=100 | Expression of CYTOR |            | P value |
|-----------------|-------|---------------------|------------|---------|
|                 |       | High (n=50)         | Low (n=50) |         |
| Age (years)     |       |                     |            | 0.829   |
| <65             | 31    | 16                  | 15         |         |
| ≥65             | 69    | 34                  | 35         |         |
| Gender          |       |                     |            | 0.841   |
| Male            | 47    | 24                  | 23         |         |
| Female          | 53    | 26                  | 27         |         |
| Location        |       |                     |            | 0.216   |
| Right           | 38    | 16                  | 22         |         |
| Others          | 62    | 34                  | 28         |         |
| pT stage        |       |                     |            | 0.033*  |
| T1              | 3     | 1                   | 2          |         |
| T2              | 11    | 2                   | 9          |         |
| T3              | 40    | 18                  | 22         |         |
| T4              | 46    | 29                  | 17         |         |
| pN stage        |       |                     |            | <0.001* |
| N0              | 32    | 7                   | 25         |         |
| N1              | 40    | 23                  | 17         |         |
| N2              | 28    | 20                  | 8          |         |
| pM stage        |       |                     |            | 0.006*  |
| M0              | 92    | 42                  | 50         |         |
| M1              | 8     | 8                   | 0          |         |
| TNM stage       |       |                     |            | <0.001* |
| I / II          | 32    | 7                   | 25         |         |
| III/IV          | 68    | 43                  | 25         |         |
| Differentiation |       |                     |            | 0.111   |
| Well            | 47    | 21                  | 26         |         |
| Moderate        | 40    | 19                  | 21         |         |
| Poor            | 13    | 10                  | 3          |         |
| Vessel invasion |       |                     |            | 0.317   |
| No              | 90    | 43                  | 47         |         |
| Yes             | 10    | 7                   | 3          |         |

\* $p < 0.05$  indicates a significant association among the variables.

**Supplementary Table S2.** Univariate and multivariate analysis of overall survival and disease-free survival after surgery

| Variable        | Overall survival    |                |                    |                | Disease-free survival |                |                   |                |
|-----------------|---------------------|----------------|--------------------|----------------|-----------------------|----------------|-------------------|----------------|
|                 | Univariate          |                | Multivariate       |                | Univariate            |                | Multivariate      |                |
|                 | HR (95% CI)         | <i>P</i> value | HR (95% CI)        | <i>P</i> value | HR (95% CI)           | <i>P</i> value | HR (95% CI)       | <i>P</i> value |
| Age             | 1.09 (0.54, 2.21 )  | 0.810          |                    |                | 1.01 (0.51, 1.99)     | 0.982          |                   |                |
| Gender          | 1.12 (0.59, 2.14)   | 0.732          |                    |                | 1.09 (0.58, 2.05)     | 0.788          |                   |                |
| Location        | 0.97 (0.77, 1.23)   | 0.800          |                    |                | 1.02 (0.81, 1.28)     | 0.878          |                   |                |
| T stage         | 1.73 (1.06, 2.82)   | 0.028*         |                    |                | 1.89 (1.16, 3.08)     | 0.011*         |                   |                |
| N stage         | 3.69 (2.23, 6.11)   | <0.001*        | 2.93 (1.71, 5.04)  | <0.001*        | 3.57 (2.20, 5.79)     | <0.001*        | 2.73 (1.61, 4.64) | <0.001*        |
| M stage         | 10.60 (4.31, 26.01) | <0.001*        | 5.34 (2.07, 13.77) | 0.001*         | 7.62 (3.33, 17.42)    | <0.001*        | 3.47 (1.44, 8.33) | 0.005*         |
| TNM stage       | 6.24 (3.07, 12.67)  | <0.001*        |                    |                | 4.65 (2.51, 8.64)     | <0.001*        |                   |                |
| Differentiation | 1.28 (0.81, 2.03)   | 0.286          |                    |                | 1.40 (0.90, 2.17)     | 0.131          |                   |                |
| Vessel invasion | 2.93 (1.28, 6.71)   | 0.011*         |                    |                | 3.52 (1.61, 7.72)     | 0.002*         | 2.45 (1.10, 5.47) | 0.029*         |
| CYTOR           | 3.89 (1.88, 8.05)   | <0.001*        | 2.32 (1.08, 4.98)  | 0.031*         | 3.86 (1.88, 7.94)     | <0.001*        | 2.22 (1.04, 4.73) | 0.039*         |

\**P* < 0.05 indicated that 95% CI of HR was not including. HR, hazard ratio; 95% CI, 95% confidence interval

**Supplementary Table S3.** The correlation between expression levels of CYTOR and  $\beta$ -catenin in 100 cases of colon cancer tissues

|                  | Expression of CYTOR |     | <i>p</i> -value |
|------------------|---------------------|-----|-----------------|
|                  | High                | Low |                 |
| $\beta$ -catenin |                     |     | 0.006*          |
| +                | 46                  | 34  |                 |
| -                | 4                   | 16  |                 |
| $\beta$ -catenin |                     |     | 0.008*          |
| Nuclear          | 36                  | 17  |                 |
| Cytoplasmic      | 10                  | 17  |                 |

\**p*<0.05 indicates a significant association among the variables.

**Supplementary Table S4.** Detailed sequence (5'-3') information

|                  |            |                                                                 |
|------------------|------------|-----------------------------------------------------------------|
| CYTOR            | Forward    | TGGGAATGGAGGGAAATAAA                                            |
|                  | Reverse    | CCAGGAACTGTGCTGTGAAG                                            |
| E-cadherin       | Forward    | GCCCC ATCAG GCCTC CGTTT                                         |
|                  | Reverse    | ACCTT GCCTT CTTTG TCTTT GTTGG A                                 |
| GAPDH            | Forward    | GGAGCGAGATCCCTCCAAAAT                                           |
|                  | Reverse    | GGCTGTTGTCATACTTCTCAGG                                          |
| N-cadherin       | Forward    | TGGACCATCACTCGGCTTA                                             |
|                  | Reverse    | AACTGGCAAACCTTCACG                                              |
| Vimentin         | Forward    | CGAAACTTCTCAGCATCACG                                            |
|                  | Reverse    | GCAGAAAGGCACTTGAAAGC                                            |
| $\beta$ -catenin | Forward    | TCATGCACCTTTGCGTGAGC                                            |
|                  | Reverse    | GGCGCTGGGTATCCTGATGT                                            |
| c-myc            | Forward    | TTCGGGTAGTGGAAAACCAG                                            |
|                  | Reverse    | CAGCAGCTCGAATTTCTTCC                                            |
| cyclin D1        | Forward    | GTGCTGCGAAGTGGAAACC                                             |
|                  | Reverse    | ATCCAGGTGGCGACGATCT                                             |
| sh-CYTOR-1       | sense      | TGTCTGCATCCCTCGAATAACTTTCAAGAGAAGTTATTCGAGGGATGCAGACTTTTTTC     |
|                  | anti-sense | TCGAGAAAAAAGTCTGCATCCCTCGAATAACTTCTCTTGAAAGTTATTCGAGGGATGCAGACA |
| sh-CYTOR-2       | sense      | TGACTCTGAGGCCTCTGCATTTCAAGAGAATGCAGAGGCCTCAGAGTCTTTTTTC         |
|                  | anti-sense | TCGAGAAAAAAGACTCTGAGGCCTCTGCATTCTCTTGAAATGCAGAGGCCTCAGAGTCA     |
| LV-CYTOR         | Forward    | CGCAAATGGGCGGTAGGCGTG                                           |
|                  | Reverse    | CATAGCGTAAAAGGAGCAACA                                           |

**Supplementary Table S5.** Detailed sequence of Primers used for ChIP-PCR

|      |         |                      |
|------|---------|----------------------|
| TBE1 | Forward | TTCTAGTGGGGCTGCCACA  |
|      | Reverse | AGCCTGCTGGTTTTCCAGAA |
| TBE2 | Forward | AGGCTCCAAGGGCACCATTG |
|      | Reverse | GCCTCCCACAGCTTCAAGCA |
| Neg  | Forward | AATGATCCAGAAGGCTCCTA |
|      | Reverse | GCCAGCCTTTACCTTCTTTA |
